# Supplementary material for: Fecal calprotectin concentration to assess endoscopic and histologic remission in patients with cancer with immune-mediated diarrhea and colitis
Source: HighWire-hosted journal article supplement (doi:10.1136/jitc-2020-002058), 2021-01-01
Supplement: jitc-2020-002058supp002_data_supplement.pdf [file jitc-2020-002058supp002_data_supplement.pdf]

**Supplemental Table 1.** IMDC-related characteristics of patients (n = 77)

| <b>Characteristic</b>                                                   | <b>No. (%)</b> |
|-------------------------------------------------------------------------|----------------|
| Median time from ICI initiation to IMDC onset, days (IQR)               | 103 (52-272)   |
| Median duration of ICI treatment, days (IQR)                            | 83 (42-249)    |
| Median duration of initial IMDC symptoms, days (IQR)                    | 56 (37-80)     |
| Median Mayo endoscopic subscore (IQR)                                   | 2 (0-3)        |
| Overall median duration of steroid therapy for initial IMDC, days (IQR) | 38 (29-47)     |
| Median number of steroid tapering attempts prior to SIT use (IQR)       | 2 (1-3)        |
| Type of SIT                                                             |                |
| Vedolizumab alone                                                       | 46 (60)        |
| Infliximab alone                                                        | 16 (21)        |
| Vedolizumab and infliximab combined                                     | 15 (19)        |

IMDC, immune-mediated diarrhea and colitis; ICI, immune checkpoint inhibitor; IQR, interquartile range; SD, standard deviation; SIT, selective immunosuppressive therapy.

**Supplemental Table 2.** Association between treatment of IMDC and differences in fecal calprotectin concentration between IMDC onset and last fecal calprotectin test following treatment of IMDC (n = 77)

| Characteristic                      | No.<br>(%) | FC concentration, mcg/g<br>Mean $\pm$ SD | P*    |
|-------------------------------------|------------|------------------------------------------|-------|
| Steroid therapy duration            |            |                                          | 0.469 |
| $\leq 30$ days                      | 23 (30)    | 286 $\pm$ 39                             |       |
| $> 30$ days                         | 54 (70)    | 342 $\pm$ 73                             |       |
| Number of steroid tapering attempts |            |                                          | 0.623 |
| 1-2                                 | 56 (73)    | 274 $\pm$ 64                             |       |
| $\geq 3$                            | 21 (27)    | 313 $\pm$ 42                             |       |
| Number of SIT infusions             |            |                                          | 0.033 |
| 1-2                                 | 25 (32)    | 224 $\pm$ 54                             |       |
| $\geq 3$                            | 52 (68)    | 379 $\pm$ 42                             |       |

FC, fecal calprotectin; IMDC, immune-mediated diarrhea and colitis; SD, standard deviation.

\*Based on unpaired *t* test for 2-group comparison.

**Supplemental Table 3.** Univariate logistic regression analysis of association of fecal calprotectin concentration with clinical, endoscopic, and histologic remission (n = 77)

| Outcome              | OR (95% CI)      | P      |
|----------------------|------------------|--------|
| Clinical remission   | 0.99 (0.98-1.00) | 0.051  |
| Endoscopic remission | 0.97 (0.96-0.99) | <0.001 |
| Histologic remission | 0.99 (0.98-1.01) | 0.056  |

OR, odds ratio; CI, confidence interval.

**Supplemental Table 4.** Predictive values of fecal lactoferrin for endoscopic and histologic remission (n = 64)

| Endpoint                   | Specificity | Sensitivity | NPV  | PPV  |
|----------------------------|-------------|-------------|------|------|
| Endoscopic remission, n=38 | 54%         | 67%         | 0.32 | 0.48 |
| Histologic remission, n=20 | 52%         | 80%         | 0.57 | 0.15 |

NPV, negative predictive value; PPV, positive predictive value.
