# Supplementary figures and images for: Fecal calprotectin concentration to assess endoscopic and histologic remission in patients with cancer with immune-mediated diarrhea and colitis
Source: HighWire-hosted journal article supplement (doi:10.1136/jitc-2020-002058), 2021-01-01

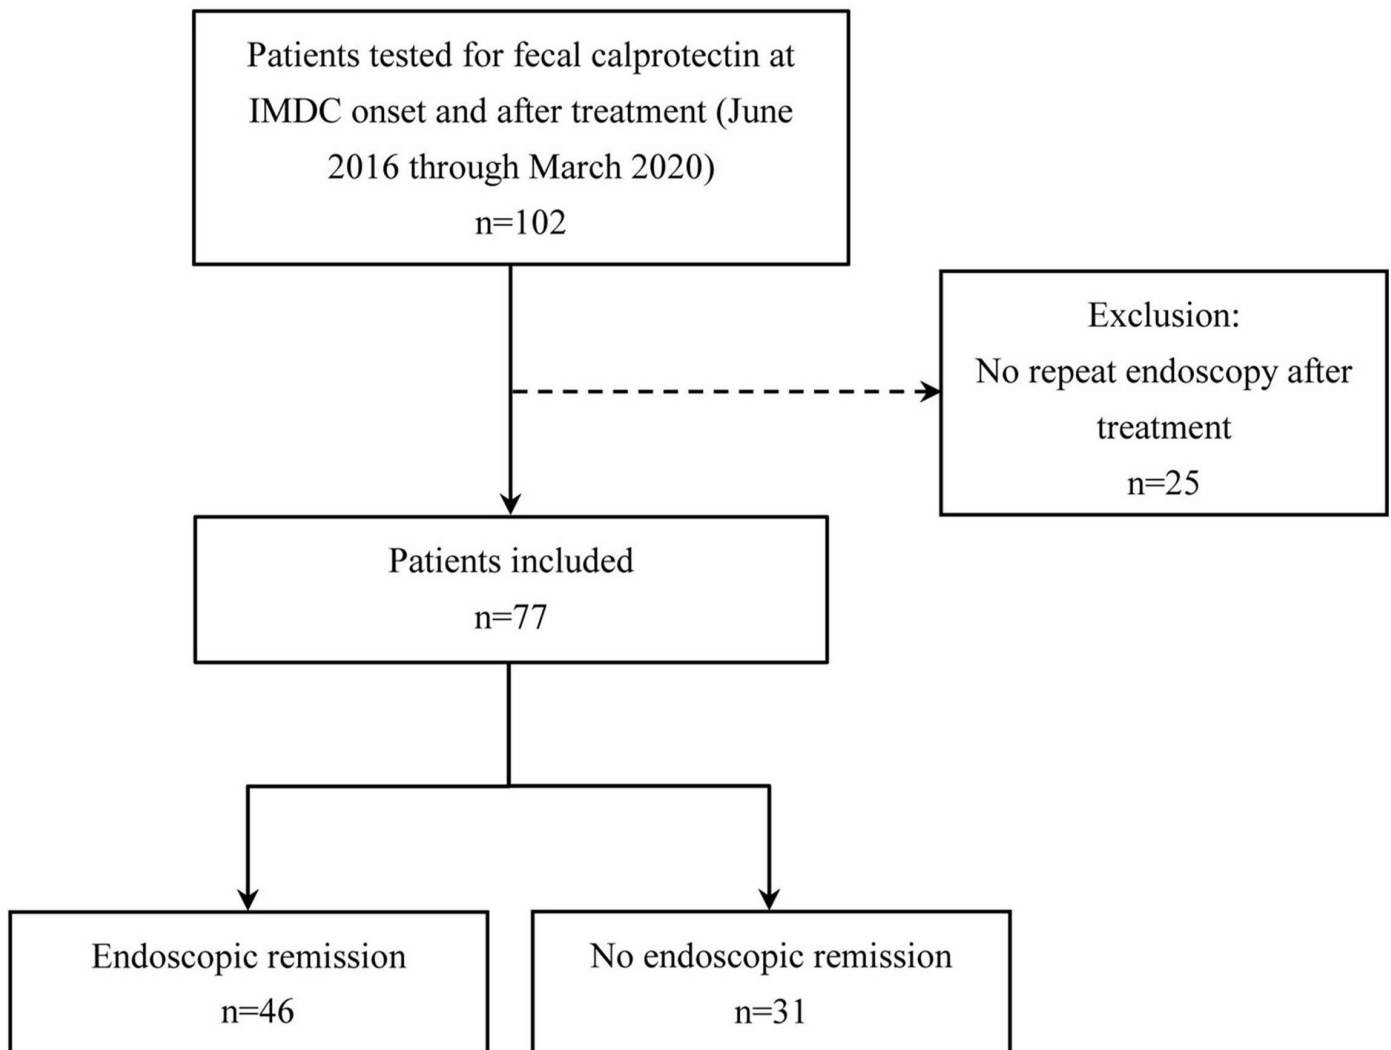

Supplement: jitc-2020-002058supp001_data_supplement.pdf [file jitc-2020-002058supp001_data_supplement.pdf]

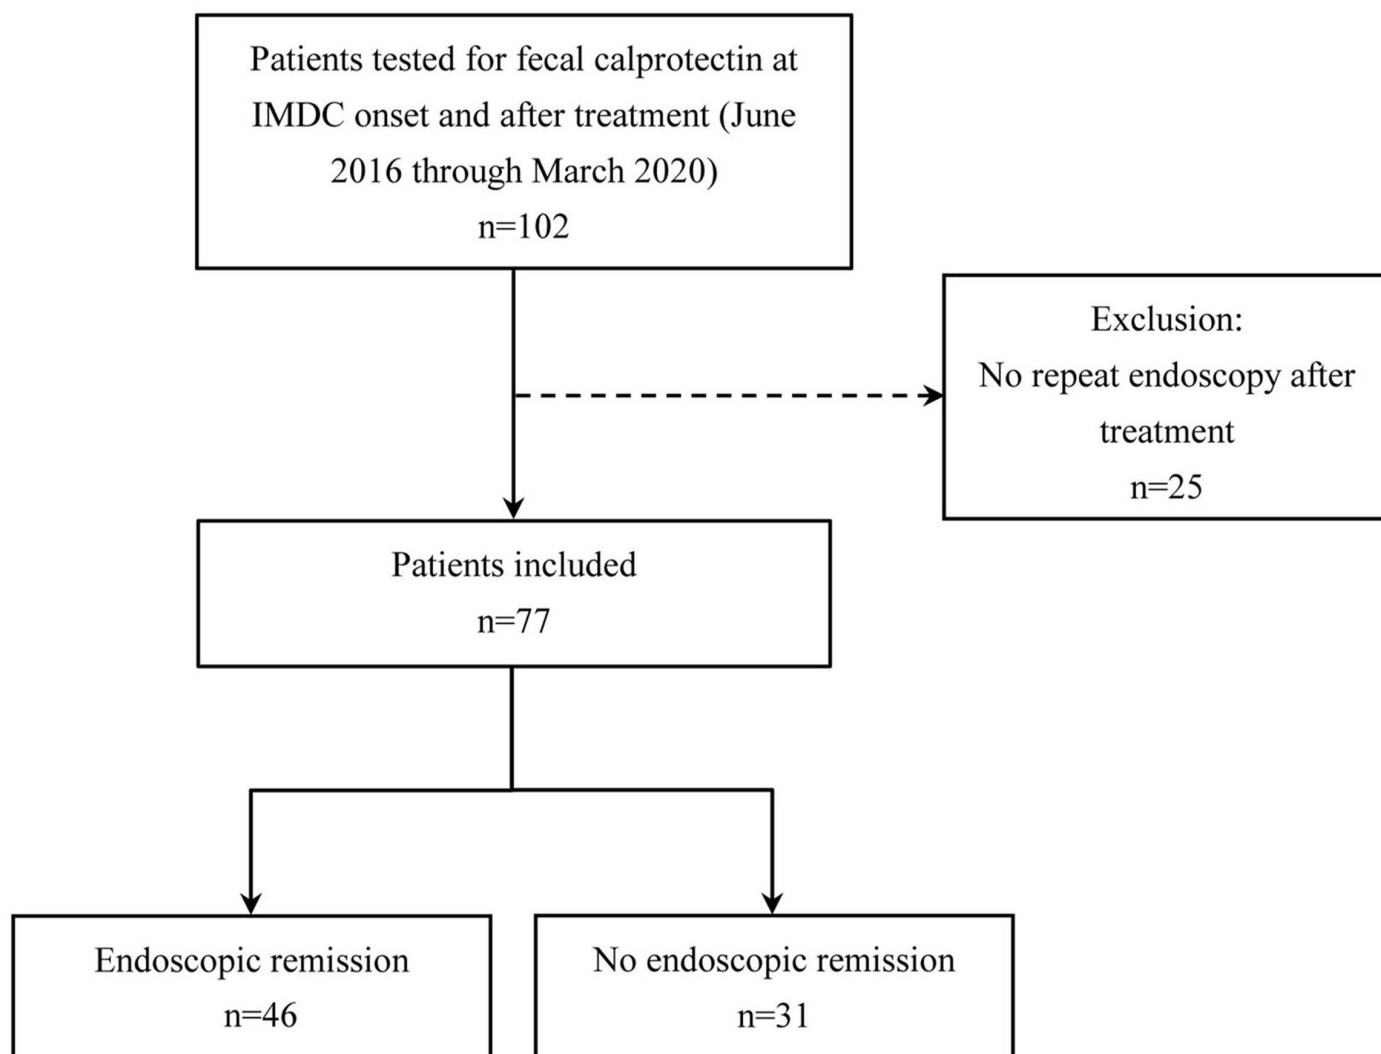

Supplement: jitc-2020-002058supp001_data_supplement.pdf [file jitc-2020-002058supp001_data_supplement.pdf]
